# Supplementary material for: Albumin-based nanosystem for dual-modality imaging-guided chem-phototherapy against immune-cold triple-negative breast cancer
Source: PubMed Central journal article supplement (PMC10548782; doi:10.1093/rb/rbad073), 2023-08-31
Supplement: rbad073_supplementary_data.pdf [file rbad073_supplementary_data.pdf]

## Support Information

### **Albumin based nanosystem for dual-modality imaging guided chem-phototherapy against immune cold triple-negative breast cancer**

Chen Peng <sup>a,1</sup>, Xiaodie Zeng <sup>a,1</sup>, Jiali Cai <sup>a,1</sup>, Hanyu Huang <sup>a</sup>, Fang Yang<sup>d</sup>,

Shaowen Jin<sup>c\*\*\*</sup>, Xiuhong Guan <sup>b\*\*</sup>, Zhiyong Wang <sup>a\*</sup>

a. Key Laboratory for Polymeric Composite and Functional Materials of Ministry of Education, School of Materials Science and Engineering, Sun Yat-Sen University, Guangzhou, 510275, China

b. Department of Radiology, The Sixth Affiliated Hospital of Guangzhou Medical University, Qingyuan People's Hospital, Qingyuan, 511518, China

c. Department of Gastrointestinal Surgery, Sun Yat-Sen Memorial Hospital, Sun Yat-Sen University, Guangzhou, 510120, China

d. Department of Pediatrics, Department of Nuclear Medicine, Guangdong Provincial Engineering Research Center of Molecular Imaging, the Fifth Affiliated Hospital, Sun Yat-sen University, Zhuhai, 519000, China

1 The authors contributed equally to this work.

Corresponding authors

Zhiyong Wang: wangzhiy3@mail.sysu.edu.cn

Xiuhong Guan: xiuhongguan20@163.com

Shaowen Jin: jinshw3@mail.sysu.edu.cn

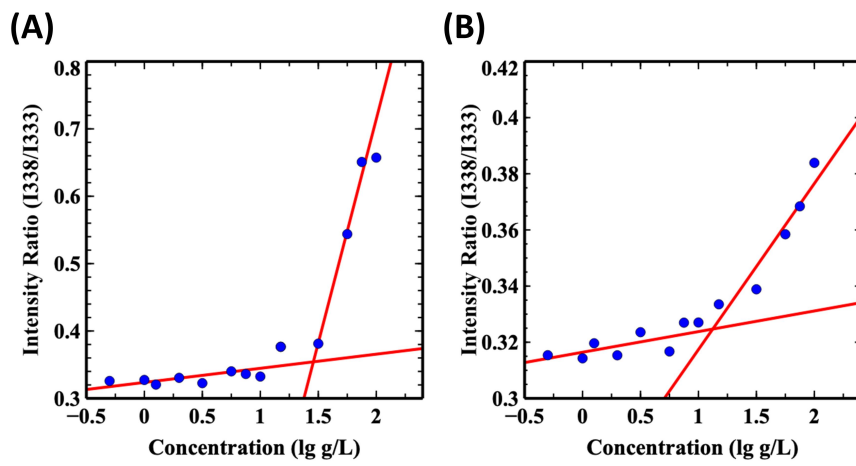

**Fig. S1** Critical micelle concentration of (A) BSA and (B) BSA based nanosystem by pyrene fluorescence probe method (I338/I333).

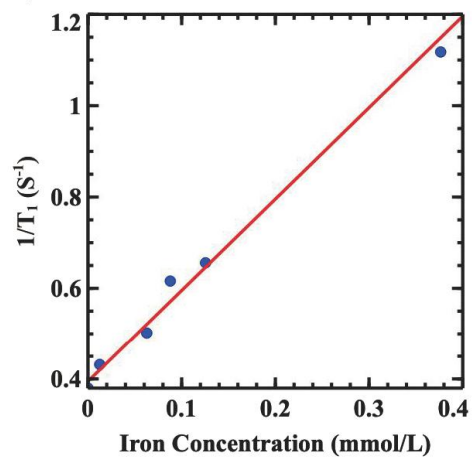

**Fig. S2** Relationship between MR longitudinal relaxation time and concentration of IR780@BSA@SPIO nanosystem.

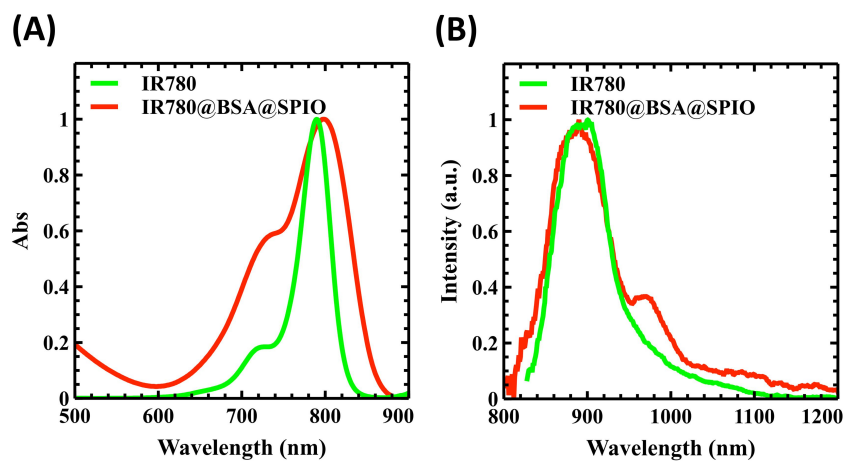

**Fig. S3** UV-vis absorption (A) and photoluminescence spectra (B) of the free IR780 and IR780@BSA@SPIO.

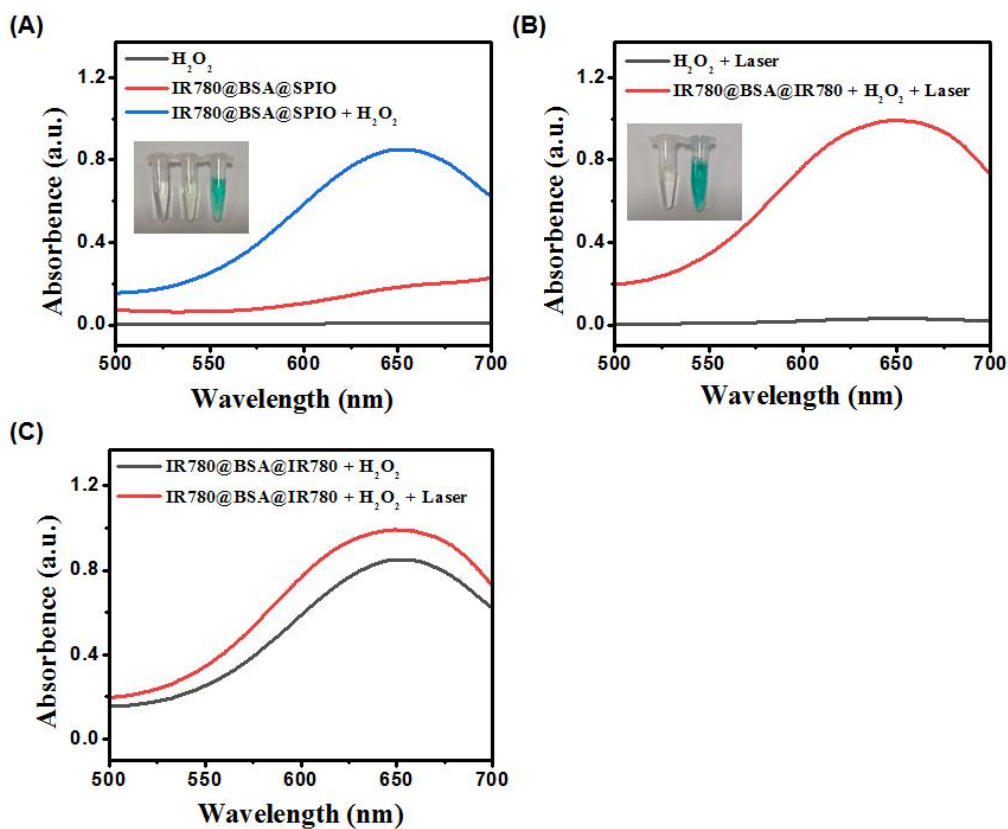

**Fig. S4** The UV-Vis spectrum and photos of the oxidized TMB from the reaction of IR780@BSA@SPIO nanosystem with the  $\text{H}_2\text{O}_2$  under different conditions.

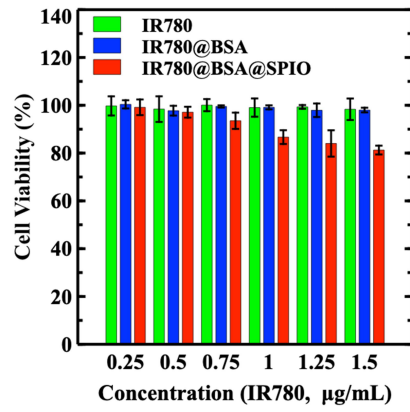

**Fig. S5** The cytotoxicity of the material towards 4T1 cells at different concentrations. The data are expressed as mean  $\pm$  standard deviation (n=3).

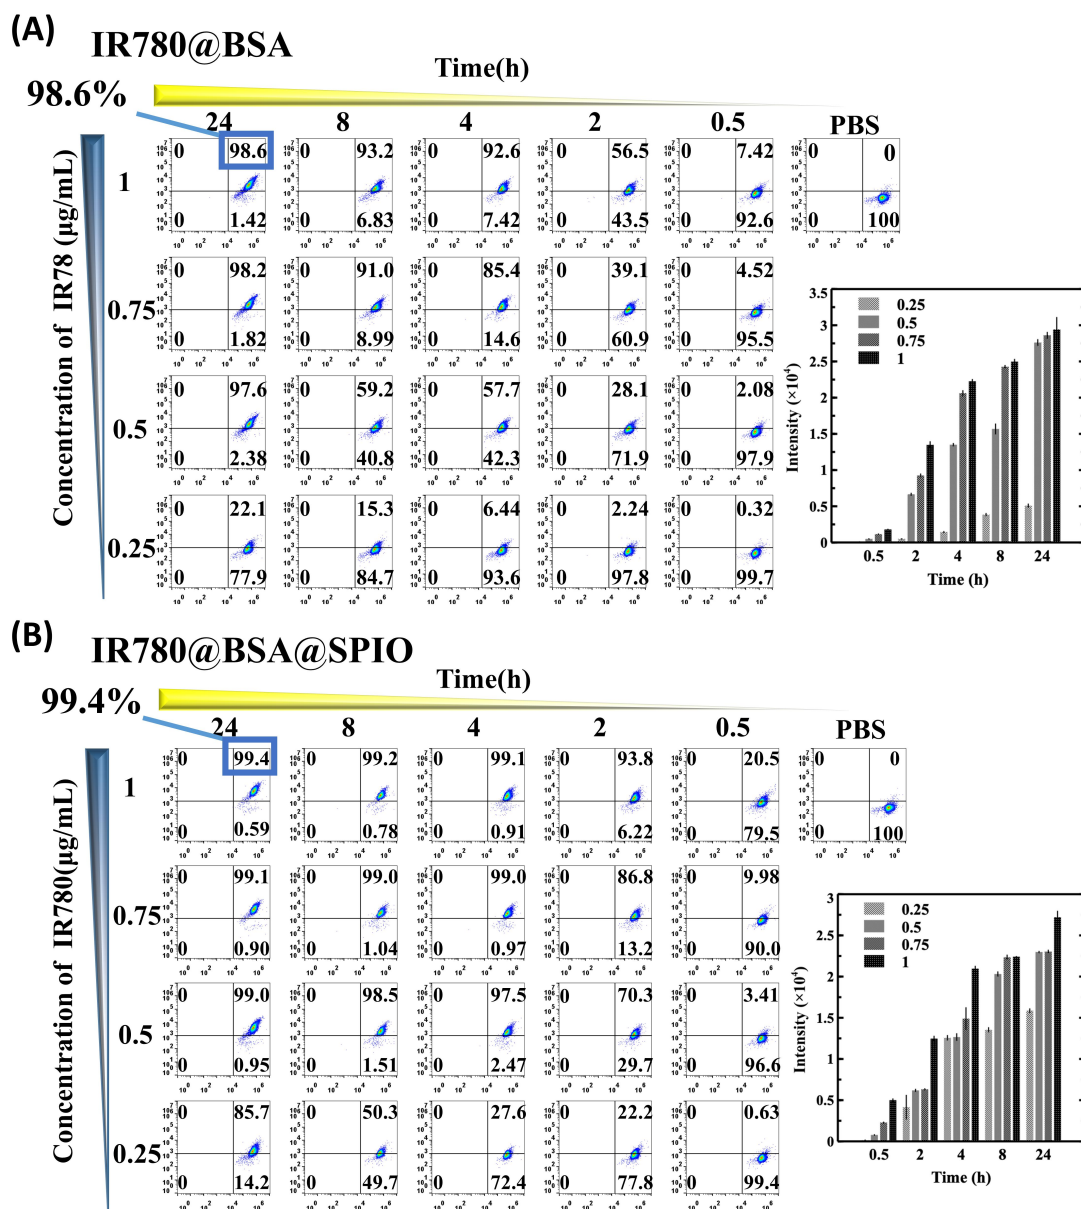

**Fig. S6** Flow cytometry was used to quantitatively analyze the IR780@BSA (A) and IR780@BSA@SPIO (B) nanodrugs uptake effect of 4T1 cells at different drug concentrations and incubation times. The data are expressed as mean  $\pm$  standard deviation ( $n = 3$ ).



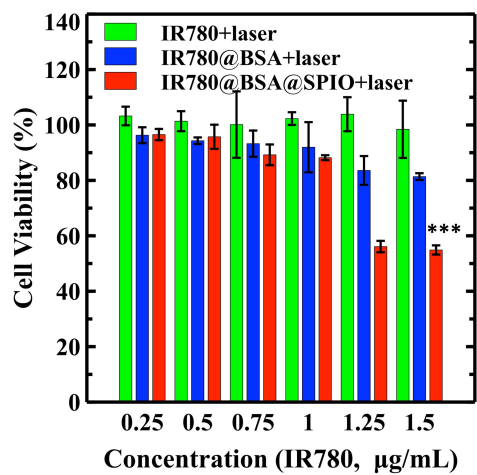

**Fig. S7** The cell viability of 293T cells after nanosystem based phototherapy. The data are expressed as mean  $\pm$  standard deviation (n = 3). \*\*\*P < 0.001.

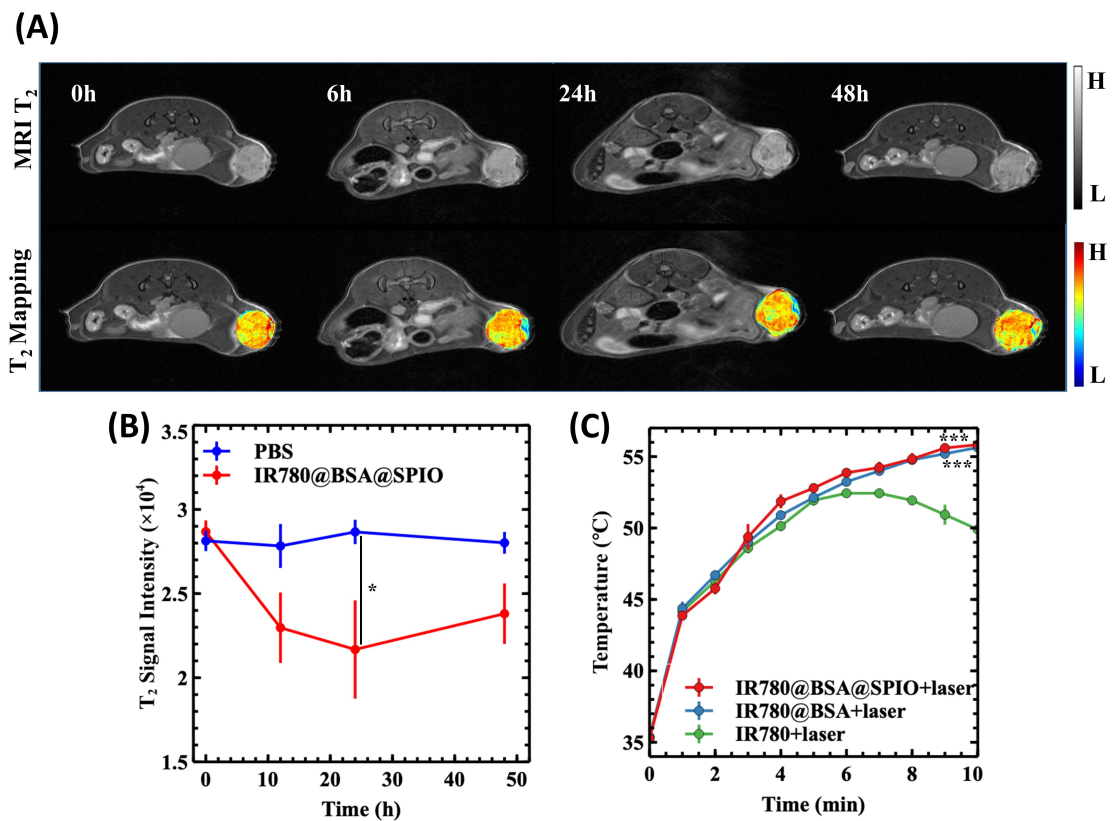

**Fig. S8** (A) *In vivo* MR imaging analysis of tumor-bearing mice after PBS injection into the tail vein. Color according to the local gray value. (B) Semi-quantitative MR imaging analysis of tumor-bearing mice after administration with PBS and IR780@BSA@SPIO nanosystem. The data between two groups is evaluated. (C) Temperature changes in the tumor area in different treatment groups. The data are expressed as mean  $\pm$  standard deviation ( $n = 3$ ). \* $P < 0.05$ , \*\*\* $P < 0.001$ .

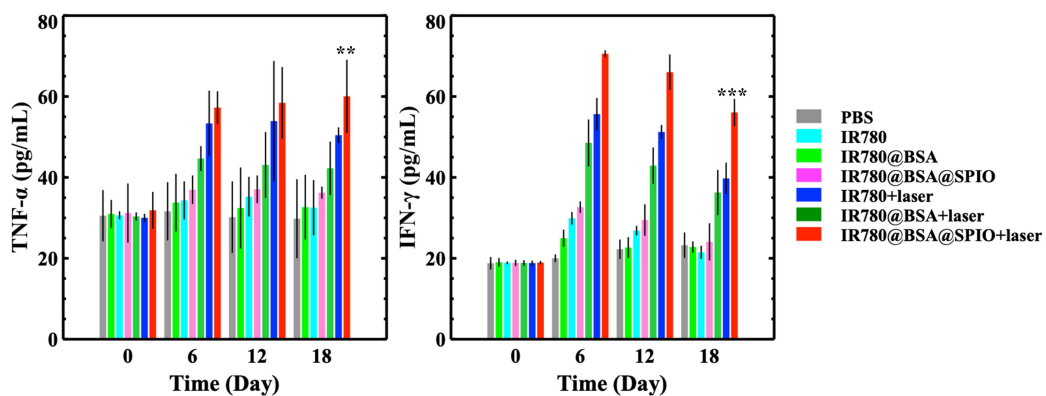

**Fig. S9** The levels of TNF- $\alpha$  and IFN- $\gamma$  inflammatory cytokines from different treatment groups.

The data between the IR780@BSA@SPIO nanosystem exposed to laser irradiation and the other groups are evaluated and expressed as mean  $\pm$  standard deviation ( $n = 3$ ). \*\*P < 0.01, \*\*\*P < 0.001.
